# Supplementary material
Source: PubMed Central journal article supplement (PMC165814)

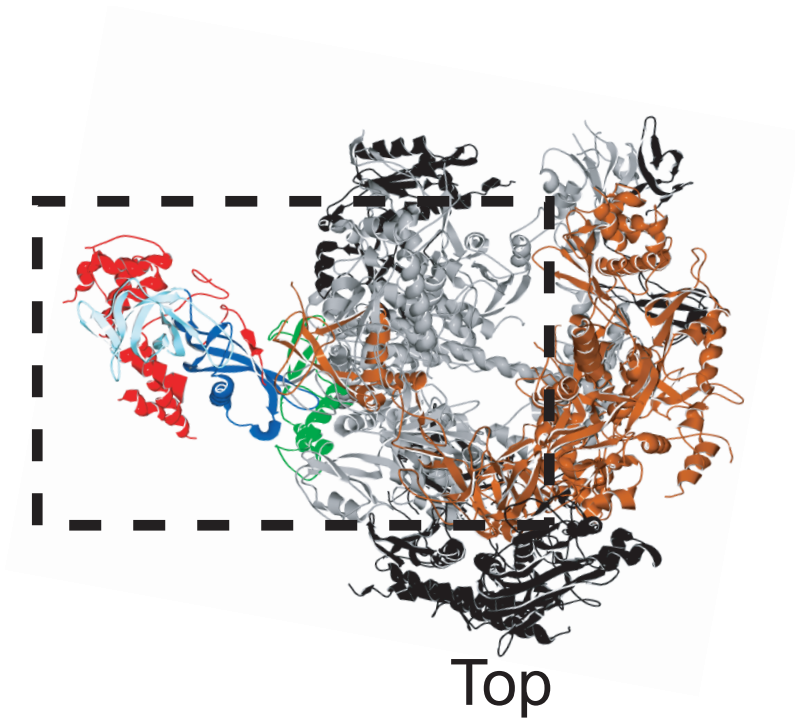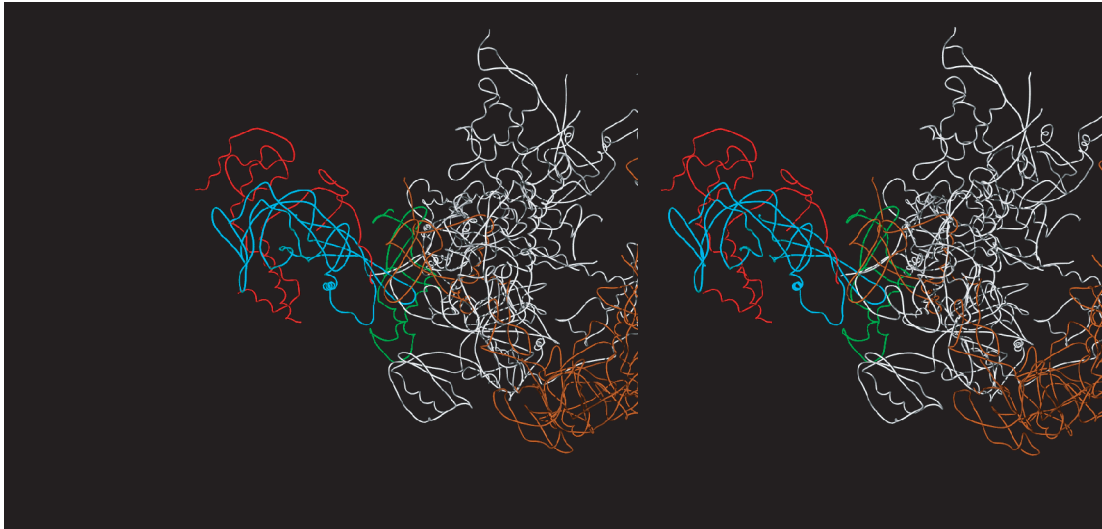

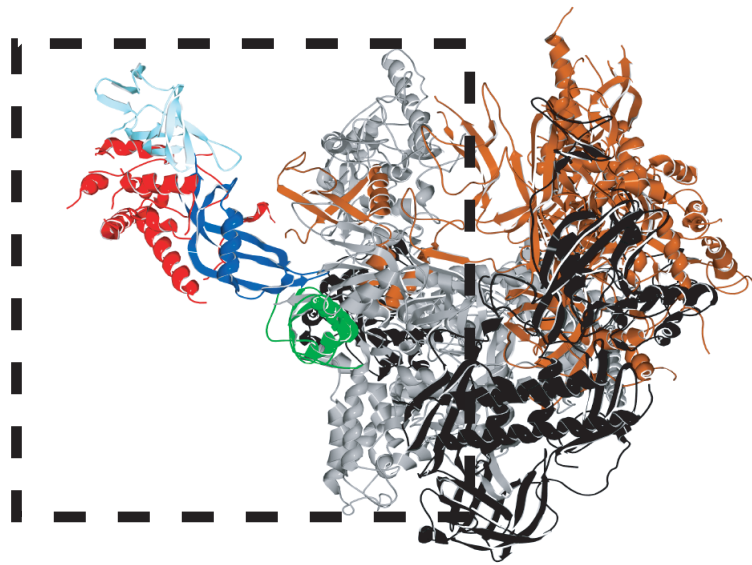

Back

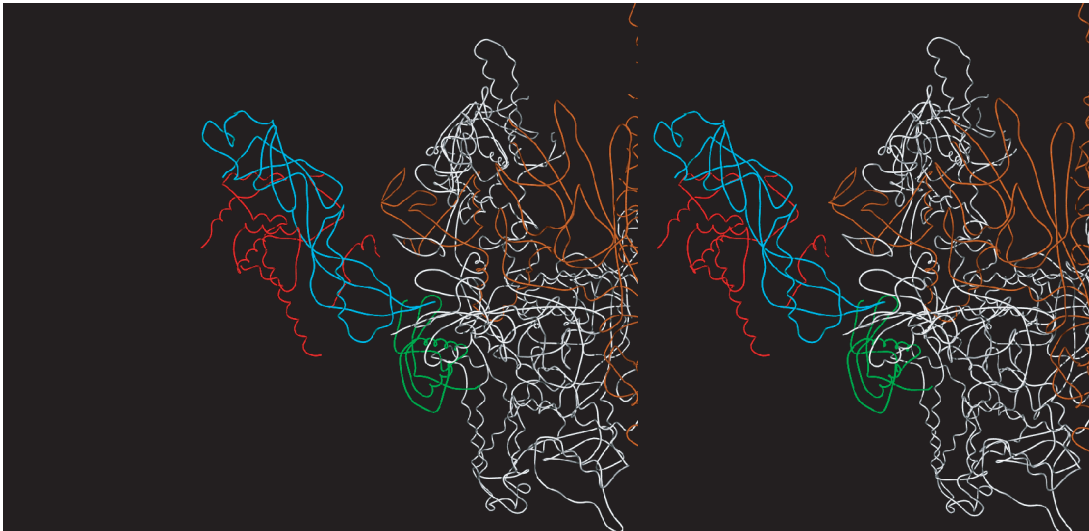

B

Supplement: pnas_1130601100_1.pdf [file pnas_1130601100_1.pdf]

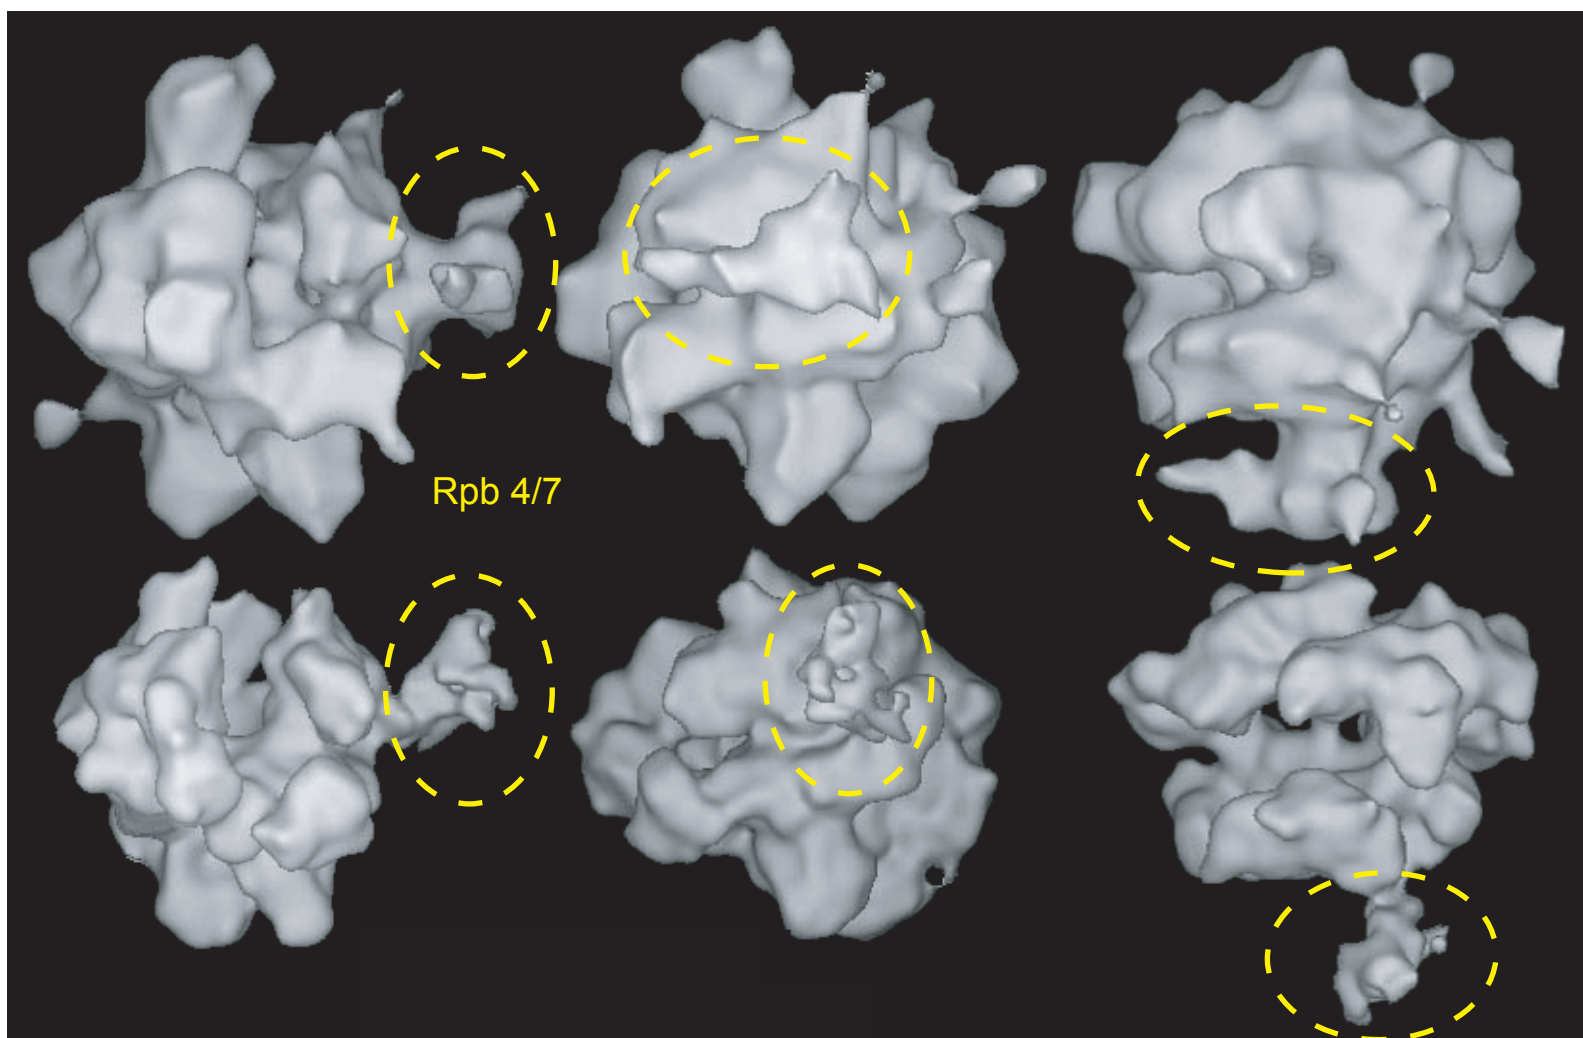

Rpb 4/7

Front

Side

Top

Supplement: pnas_1130601100_2.pdf [file pnas_1130601100_2.pdf]
